# Supplementary material
Source: Springer Nature journal article supplement (https://www.springermedizin.de/resource/supplementary/12967_2013_1763_MOESM4_ESM.pdf/9575298)

**X 200****X 400****HLA class1**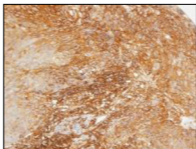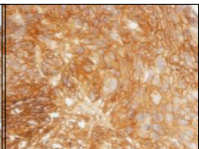**URLC10**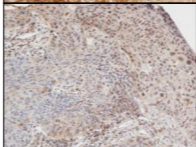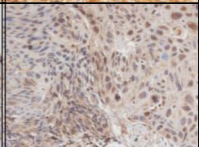**TTK**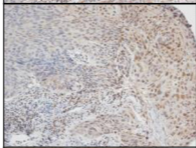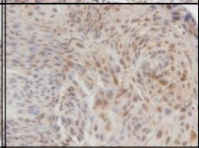**KOC1**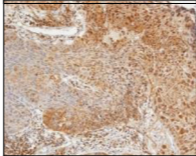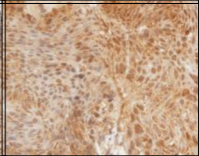**VEGFR1**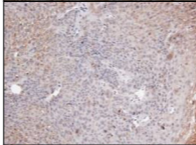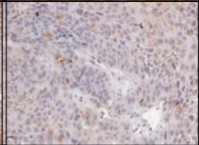**VEGFR2**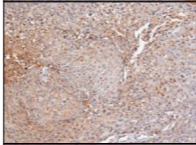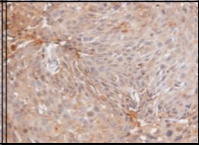**HE**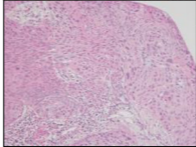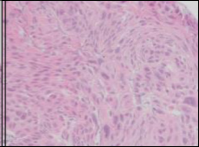

Supplement: MOESM4 [file 9575298]
